# Supplementary material for: Stacking-tuned quantum anomalous Hall effect and multi-phase transition in Kagome lattice V2Se3
Source: Royal Society of Chemistry journal article supplement (doi:10.1039/d4tc03058c), 2024-01-01
Supplement: d4tc03058c1.pdf [file d4tc03058c1.pdf]

Electronic Supplementary Information for  
**Stacking-tuned Quantum Anomalous Hall Effect and Multi-phase Transition in Kagome Lattice  $V_2Se_3$**

Lixin Zhang <sup>a</sup>, Naibin Wang <sup>a</sup>, Xiuwen Zhao <sup>a</sup>, Guichao Hu <sup>a</sup>, Junfeng Ren <sup>\*a,b</sup> and Xiaobo Yuan <sup>\*a</sup>

<sup>a</sup> School of Physics and Electronics, Shandong Normal University, Jinan 250358, China

<sup>b</sup> Shandong Provincial Engineering and Technical Center of Light Manipulations & Institute of Materials and Clean Energy, Shandong Normal University, Jinan 250358, China

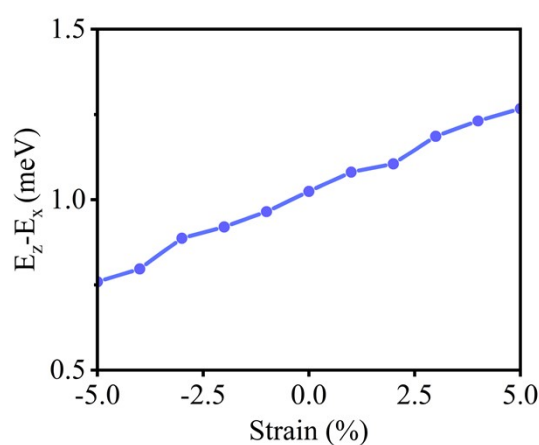

Figure S1 The magnetic anisotropy energy values of ML  $V_2Se_3$  change with strain from -5% to 5%.

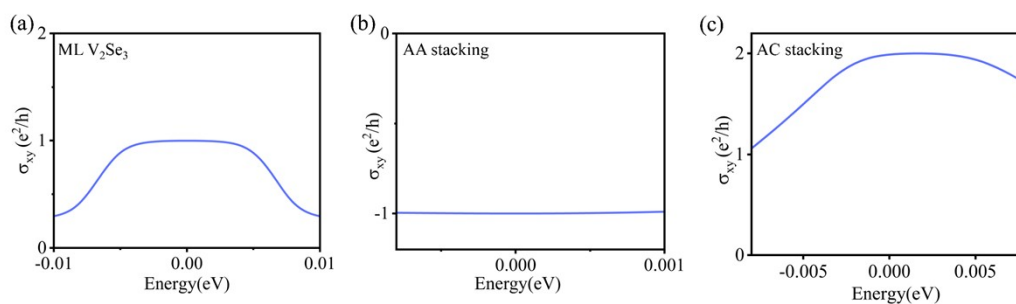

Figure S2 The anomalous Hall conductance for (a) ML  $V_2Se_3$  with 1% biaxial tensile strain, (b) AA stacking with 4% biaxial tensile strain, and (c) AC stacking.

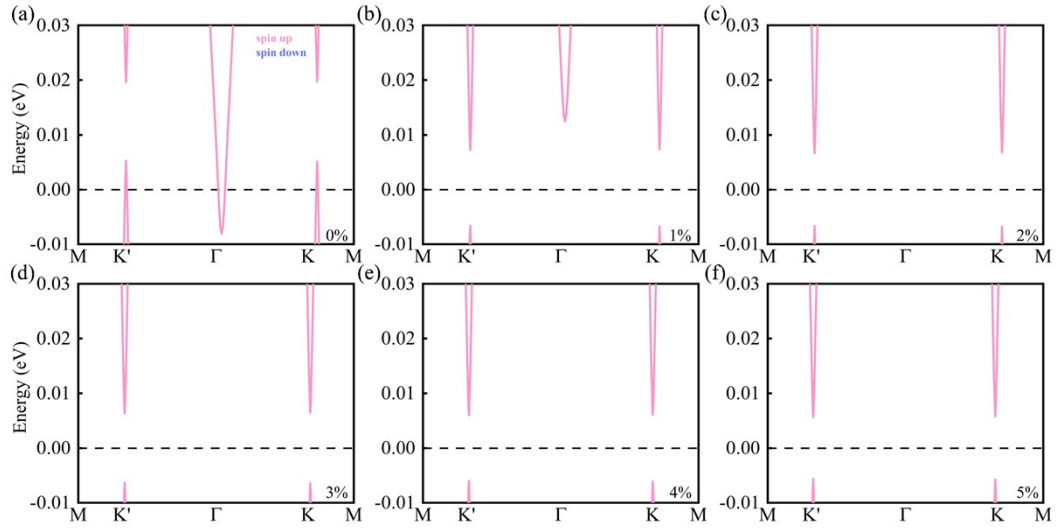

Figure S3 The change of energy bands considering SOC under 0-5% biaxial tensile strain.

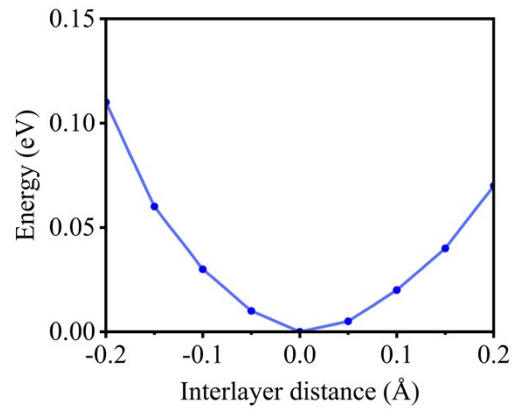

Figure S4 The energy diagram for different interlayer distances of AA stacking.

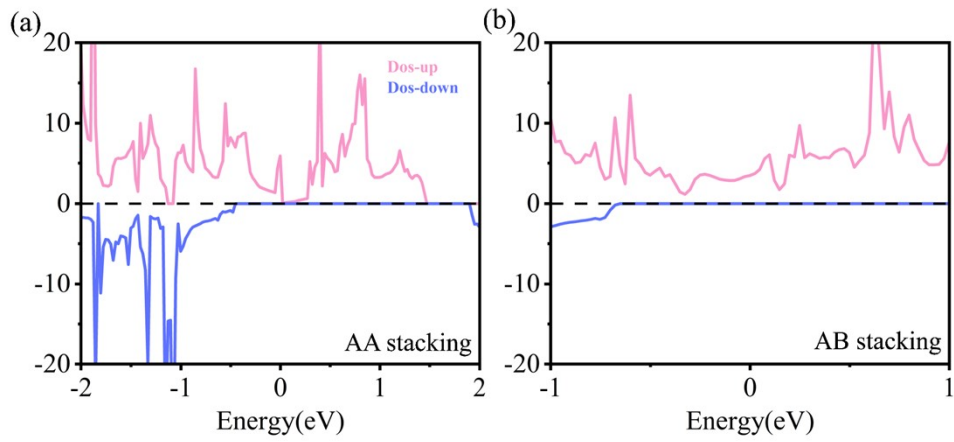

Figure S5 The density of states for (a) AA stacking and (b) AB stacking, respectively.

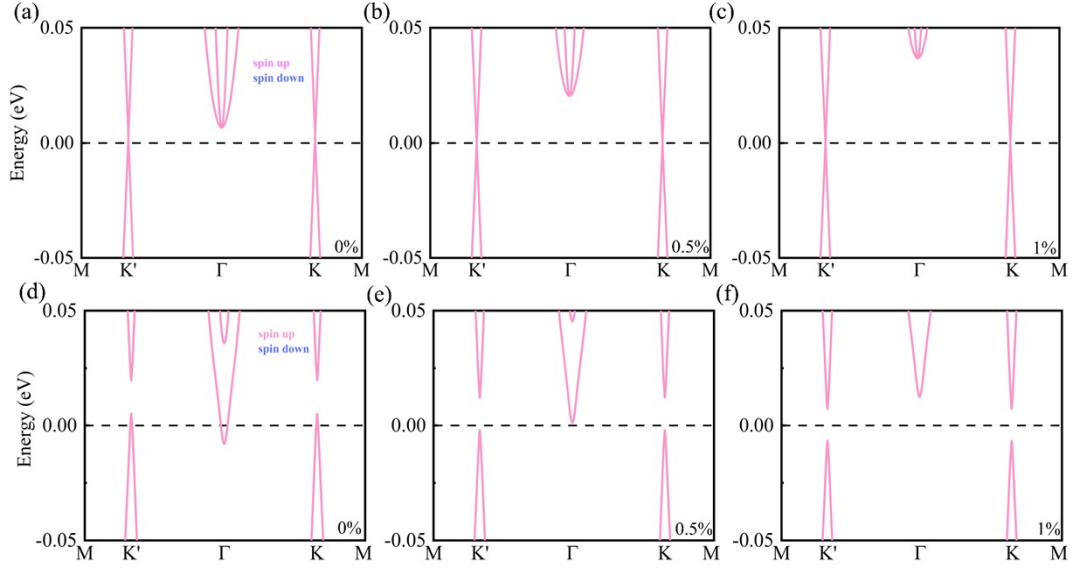

Figure S6 The band structures of ML  $V_2Se_3$  under different tensile strains (0%, 0.5%, 1%), (a)-(c) without SOC, and (d)-(f) with SOC.

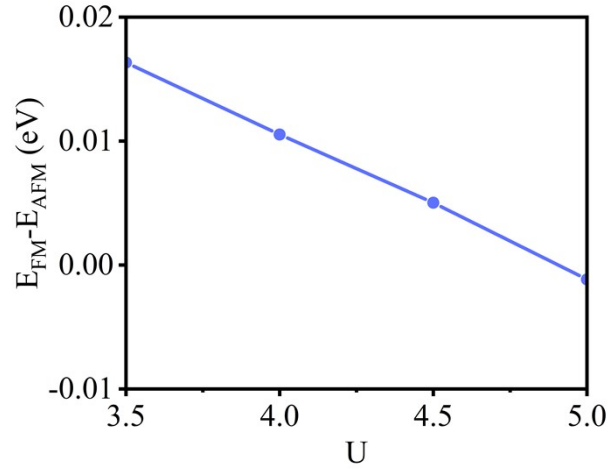

Figure S7 The energy difference of the magnetic state for different  $U$  values.

Table S1 The irreducible representations (irreps) of the valence band and conduction band near the Fermi surface in ML  $V_2Se_3$  with SOC, which are provided in ascending order of the energy eigenvalues. The numbers in bracket indicate their degeneracy.

| Spinless | $\Gamma$               | $K$            | $M$            |
|----------|------------------------|----------------|----------------|
| Bands    | $\Gamma_3^-(1)$        | $K_6(2)$       | $M_3^+(1)$     |
|          | $\Gamma_5^+(1)$        |                | $M_2^-(1)$     |
| Spinful  | $\Gamma$               | $K$            | $M$            |
| Bands    | $\bar{\Gamma}_{17}(1)$ | $\bar{K}_7(1)$ | $\bar{M}_3(1)$ |
|          | $\Gamma_8(1)$          | $K_9(1)$       | $M_6(1)$       |
